# Supplementary material for: Effect of Milk Origin and Seasonality of Yogurt Acid Whey on Antioxidant Activity before and after In Vitro Gastrointestinal Digestion
Source: MDPI journal article supplement (doi:10.3390/antiox12122130), 2023-12-18
Supplement: s1 [file s1]

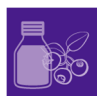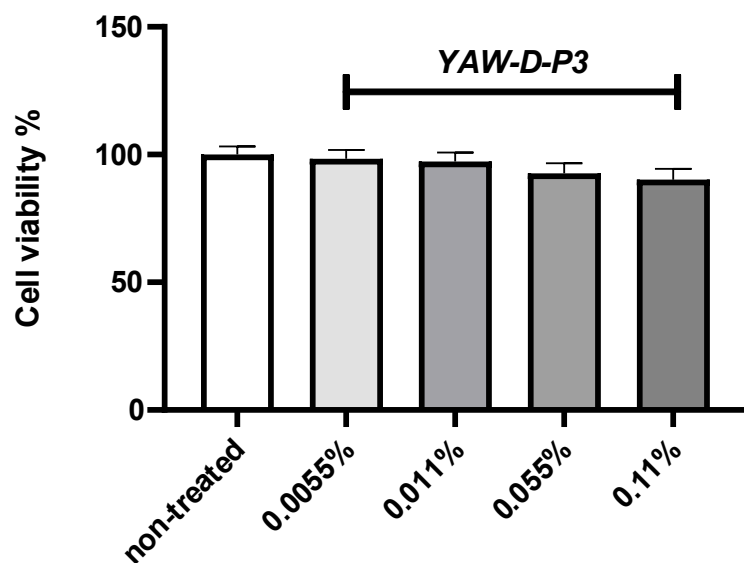

**Figure S1.** Cell viability (MTT assay) after treatment with different concentrations of YAW-D-P3 (0.0055–0.11% w/v; concentration refers to YAW-D protein). HT29 ( $5 \times 10^4$  cells/well) were grown in 96-well plates for 24 hours. Non-treated cells were set at 100% cell viability and the results of YAW-D-P3 are expressed as the percentage of non-treated cells.
